# Supplementary material for: TRPM channels mediate learned pathogen avoidance following intestinal distention
Source: eLife. 2021 May 25;10:e65935. doi: 10.7554/eLife.65935 (PMC8177887; doi:10.7554/eLife.65935)
Supplement: Figure 1—figure supplement 1—source data 1. [file elife-65935-fig1-figsupp1-data1.xlsx]

## Sheet: Figure 1-supplement 1
Time (hours)	E. faecium			E. faecalis			S. aureus
1	29.4118	14.2857	13.3333	68.1818	75	75	32	32	26.9231
2	23.5294	28.5714	36.6667	68.1818	62.5	62.5	56	44	38.4615
3	35.2941	57.1429	26.6667	50	41.6667	41.6667	32	48	34.6154
4	50	50	66.6667	40	30	25	52	64	57.6923
5	55.8824	67.8571	46.6667				40	44	46.1538
6	26.4706	50	33.3333	36.3636	37.5	37.5
7	23.5294	53.5714	43.3333
8	32.3529	60.7143	36.6667
18							8	8	3.8462
24	2.94118	10.7143	13.3333	4.5455	12.5	12.5	0	0	0
