# Supplementary material for: TRPM channels mediate learned pathogen avoidance following intestinal distention
Source: eLife. 2021 May 25;10:e65935. doi: 10.7554/eLife.65935 (PMC8177887; doi:10.7554/eLife.65935)
Supplement: Figure 2—source data 1. [file elife-65935-fig2-data1.xlsx]

## Sheet: Figure 2B
Anterior
Hours	E. coli																		P. aerugonisa																		E. faecalis
1	10.03	10.15	6.978	30.068	13.336	11.8	9.848	9.392	19.31	9.762	28.489								10.404	14.323	19.657	13.077	17.671	25.538	17.174	18.158	10.542	9.149	18.792	10.858	13.442	20.622	8.064	7.948	7.743	11.122	34.732	21.148	36.72	31.268	19.86	29.324	36.033	35.975	25.374	28.938	32.812	31.166	37.684
2	19.86	5.42	28.005	15.58	13.457	6.124	21.324	11.932	4.722	15.44	9.293	6.343	6.222						16.651	22.173	11.251	10.84	15.644	19.06	23.98	25.703	12.036	10.694	11.717	12.769	19.041	18.939					33.428	35.746	35.665	35.601	37.913	33.782	31.535	19.868	32.747	23.507	31.774	21.307	23.928
4	13.451	9.188	10.512	7.321	9.118	8.553	4.618	8.344	9.332	7.639	8.064	16.469	12.119	7.79	16.25	8.463	9.65		30.64	13.016	11.59	10.217	11.337	17.671	6.267	27.381	21.873	24.207	13.2	20.972	20.647	13.723	18.165	13.623	9.782	13.912	28.079	36.446	37.173	22.965	30.827	28.097	29.104	37.783	28.54	29.221	31.079	32.655	28.091
Medial
Hours	E. coli																		P. aerugonisa																		E. faecalis
1	5.075	7.989	6.196	4.255	3.972	6.861	4.722	5.924	5.353										3.463	4.679	4.404	3.235	5.231	4.548	5.479	4.831	8.885	8.261	3.32	4.881	5.674	6.248	4.062	4.321	5.383	2.962	13.457	9.082	10.66	3.32	4.548	10.157	9.43	8.702	4.062	2.893	13.053	10.622	13.996
2	6.549	6.196	7.365	4.062	5.231	5.737	4.431	11.576	5.786	5.595	7.49	6.725	5.457	3.941					4.131	4.954	4.722	4.653	4.44	5.114	5.702	7.554	7.381	7.109	6.531	5.848	6.623						8.183	11.662	11.348	8.246	12.845	12.408	8.074	12.281	7.018	4.954	3.688	8.024	9.065
4	6.432	6.902	4.897	5.841	6.228	4.413	6.248	4.722	6.695	5.42	4.954	5.681	7.717	7.79	6.867				9.925	4.032	5.964	6.902	5.114	4.897	4.679	5.383	6.861	6.623	5.848	7.098	5.114	7.49	6.531	5.216			10.408	17.068	10.914	9.481	8.867	12.485	10.512	9.994	9.929	8.586	10.649	8.628	9.749
[truncated: 5 more columns]
