# Supplementary material for: TRPM channels mediate learned pathogen avoidance following intestinal distention
Source: eLife. 2021 May 25;10:e65935. doi: 10.7554/eLife.65935 (PMC8177887; doi:10.7554/eLife.65935)
Supplement: Figure 4—figure supplement 1—source data 1. [file elife-65935-fig4-figsupp1-data1.xlsx]

## Sheet: Figure 4-supplement 1
Hours	WT									ocr-2(ak47)									osm-9(yz6)
1	0.76	0.833333	0.769231	0.775	0.857143	0.730769	0.7	0.84	0.678571	0.75	0.761905	0.772727	0.483871	0.666667	0.9375	0.714286	0.692308	0.904762	0.47619	0.7	0.8	0.512195	0.513514	0.583333	0.652174	0.894737	0.655172
2	0.72	0.666667	0.730769	0.625	0.714286	0.692308	0.566667	0.8	0.642857	0.5	0.47619	0.681818	0.451613	0.533333	0.625	0.619048	0.576923	0.666667	0.428571	0.633333	0.68	0.487805	0.432432	0.483333	0.565217	0.526316	0.517241
3	0.6	0.633333	0.538462	0.525	0.464286	0.5	0.433333	0.6	0.642857	0.3	0.428571	0.409091	0.225806	0.433333	0.375	0.333333	0.423077	0.47619	0.380952	0.4	0.4	0.317073	0.378378	0.266667	0.434783	0.684211	0.241379
4	0.36	0.4	0.384615	0.25	0.285714	0.307692	0.266667	0.24	0.428571	0.2	0.285714	0.272727	0.290323	0.4	0.25	0.190476	0.346154	0.52381	0.190476	0.233333	0.32	0.463415	0.405405	0.333333	0.391304	0.421053	0.310345
