# Supplementary material for: TRPM channels mediate learned pathogen avoidance following intestinal distention
Source: eLife. 2021 May 25;10:e65935. doi: 10.7554/eLife.65935 (PMC8177887; doi:10.7554/eLife.65935)
Supplement: Figure 4—source data 1. [file elife-65935-fig4-data1.xlsx]

## Sheet: Figure 4C
Hours	WT									npr-1(ad609)									npr-1(ok1447)
1	0.4	0.428571	0.540541	0.428571	0.463415	0.578947	0.387097	0.428571	0.384615	0.52	0.470588	0.475247	0.517241	0.555556	0.557692	0.333333	0.461538	0.517241	0.55	0.6	0.666667	0.575	0.595238	0.657895	0.5	0.518519	0.36
2	0.433333	0.333333	0.324324	0.371429	0.414634	0.473684	0.322581	0.357143	0.423077	0.48	0.423529	0.405941	0.482759	0.444444	0.384615	0.3	0.423077	0.344828	0.5	0.48	0.606061	0.5	0.5	0.578947	0.357143	0.407407	0.32
3	0.3	0.238095	0.243243	0.285714	0.365854	0.447368	0.225806	0.285714	0.269231	0.4	0.270588	0.217822	0.413793	0.422222	0.346154	0.266667	0.307692	0.310345	0.325	0.32	0.363636	0.45	0.404762	0.473684	0.25	0.296296	0.32
4	0.2	0.190476	0.189189	0.257143	0.243902	0.315789	0.16129	0.214286	0.153846	0.2	0.188235	0.178218	0.344828	0.311111	0.230769	0.166667	0.269231	0.344828	0.2	0.28	0.30303	0.375	0.333333	0.342105	0.214286	0.148148	0.16
5	0.266667	0.238095	0.189189	0.342857	0.317073	0.447368	0.451613	0.464286	0.346154	0.8	0.776471	0.693069	0.689655	0.866667	0.711538	0.633333	0.769231	0.655172	0.8	0.76	0.818182	0.75	0.666667	0.789474	0.714286	0.851852	0.8
